# Supplementary material for: Recent advances in bismuth oxyhalide photocatalysts for degradation of organic pollutants in wastewater
Source: Royal Society of Chemistry journal article supplement (doi:10.1039/d1ra05796k), 2021-01-01
Supplement: d1ra05796k1.pdf [file d1ra05796k1.pdf]

## Supplementary Information

### Recent Advances in Bismuth Oxyhalide Photocatalysts for Degradation of Organic Pollutants in Wastewater

Yang Li <sup>1</sup>, Haiyan Jiang <sup>2</sup>, Xu Wang <sup>1</sup>, Xiaodong Hong <sup>3\*</sup>, Bing Liang <sup>4</sup>

<sup>1</sup>College of Materials Science and Engineering, Liaoning Technical University, Fuxin 123000, China

<sup>2</sup>Basic Department, Liaoning Institute of Science and Technology, Benxi, 117004, China

<sup>3</sup>School of Materials Science and Hydrogen Energy, Foshan University, Foshan 528000, China

<sup>4</sup>College of Materials Science and Engineering, Shenyang University of Chemical Technology, Shenyang 110142, China

\*Correspondence: hongxiaodong@lntu.edu.cn; Tel.: +86-13841877730

**Table S1** Controllable synthesis of BiOX photocatalysts and their photodegradation performance

| Material/method                                                                                                                         | Morphology/Dye/concentration                                                                                                          | Light                   | Degradation performance                                                                             | Refer |
|-----------------------------------------------------------------------------------------------------------------------------------------|---------------------------------------------------------------------------------------------------------------------------------------|-------------------------|-----------------------------------------------------------------------------------------------------|-------|
| BiOCl<br>hydrothermal method;<br>Bi(NO <sub>3</sub> ) <sub>3</sub> ·5H <sub>2</sub> O, ultra-water, NaCl,<br>NaOH, pH=2/7/10, 160°C 24h | 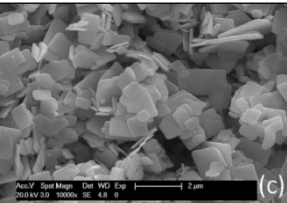                                                   | UV lamp                 | BiOCl-10>BiOCl-7>BiOCl-2<br>efficiency of oxidation gaseous Hg<br>Degradation rate:<br>Hg 2500s 60% | [3]   |
| BiOBr<br>hydrothermal approach<br>NaBiO <sub>3</sub> ·2H <sub>2</sub> O, HNO <sub>3</sub> , deionised water,<br>200°C for 24 h          |                                                    | 400W<br>halogen<br>lamp | K(pH=9)=0.037                                                                                       | [4]   |
| BiOBr<br>hydrothermal Method;<br>Bi(NO <sub>3</sub> ) <sub>3</sub> ·5H <sub>2</sub> O, NaBr, water<br>pH=2-10, 180°C for 20h            | 0.02g BiOBr<br>CIP(40ml, 5mg L <sup>-1</sup> )<br> | Xe lamp                 | BiOBr-8>BiOBr-6>BiOBr-4>BiOBr-<br>10>BiOBr-2.<br>Degradation rate:<br>RhB 45min 99%                 | [5]   |
|                                                                                                                                         | 0.2g BiOBr<br>RhB (200ml, 1×10 <sup>-5</sup> M)                                                                                       |                         |                                                                                                     |       |

|                                                                                                                                                                                                                         |                                                                                     |                                  |                                                                                                                                                                                                                                            |             |
|-------------------------------------------------------------------------------------------------------------------------------------------------------------------------------------------------------------------------|-------------------------------------------------------------------------------------|----------------------------------|--------------------------------------------------------------------------------------------------------------------------------------------------------------------------------------------------------------------------------------------|-------------|
| <p>BiOBr-1 2 3 4<br/>hydrothermal method;<br/>Bi(NO<sub>3</sub>)<sub>3</sub>·5H<sub>2</sub>O, CTAB, NaOH(adjust<br/>pH=7 5 3 2)170°C for 17h<br/>(a) BiOBr-squareBiOBr-1<br/>(b) BiOBr-circle BiOBr-4</p>               | 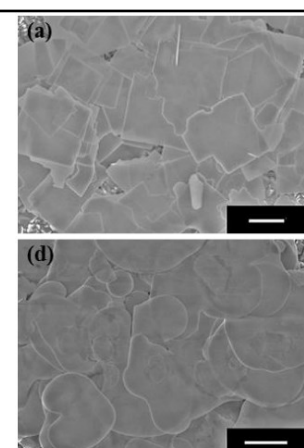   | <p>300W<br/>Xe lamp</p>          | <p>Degradation rate RhB MO phenol<br/>BiOBr-circle&gt;BiOBr-square&gt;<br/>N doped P25<br/>Degradation rate:<br/>RhB 30min 100%</p>                                                                                                        | <p>[6]</p>  |
| <p>BiOI<br/>hydrothermal approach;<br/>Bi(NO<sub>3</sub>)<sub>3</sub>·5H<sub>2</sub>O, KI, F127, glacial<br/>acetic acid; 180°C 24h and 300° 2h</p>                                                                     |    | <p>500W<br/>Xe lamp</p>          | <p>F127-BiOI&gt;BiOI<br/>KF127-BiOI=0.229<br/>kBiOI=0.108</p>                                                                                                                                                                              | <p>[7]</p>  |
| <p>BiOCl<br/>hydrothermal method;<br/>Bi(NO<sub>3</sub>)<sub>3</sub>·5H<sub>2</sub>O, dulcitol, KCl, HNO<sub>3</sub>/<br/>KOH adjusted pH=4/6/8/10 160°C<br/>24h</p>                                                    |  | <p>visible light</p>             | <p>BiOCl-4&gt;BiOCl-6&gt;BiOCl-8&gt;BiOCl-<br/>10<br/>Degradation rate:<br/>RhB 6 min more than 98%<br/>Degradation rate:<br/>TC-HCl 90 min 60%</p>                                                                                        | <p>[8]</p>  |
| <p>BiOCl<br/>hydrothermal route;<br/>Bi(NO<sub>3</sub>)<sub>3</sub>·5H<sub>2</sub>O, HNO<sub>3</sub>, C-PAM,<br/>Sodium Citrate, 0.3g NaOH, 150°C4h</p>                                                                 |  | <p>300W<br/>mercury<br/>lamp</p> | <p>BiOCl-150°&gt;BiOCl-180°&gt;BiOCl-120°<br/>BiOCl-12h&gt;BiOCl-4h&gt;BiOCl-<br/>2h&gt;BiOCl-1h<br/>BiOCl(1.2gNaOH)&gt;BiOCl(0.9gNaOH<br/>)&gt;BiOCl(0.6gNaOH)&gt;BiOCl(0.3gNaO<br/>H)&gt;BiOCl(0gNaOH)<br/>BiOCl&gt;P25<br/>K=0.0655</p> | <p>[9]</p>  |
| <p>BiOCl<br/>hydrothermal route ;<br/>BOC-1 BOC-2 BOC-3 BOC-4<br/>Bi(NO<sub>3</sub>)<sub>3</sub>·5H<sub>2</sub>O, deionized water,<br/>Xylitol(0.1g,0.3g,0.5g,1.0g),KCl,<br/>KOH,160°C24h<br/>(a)BOC-1<br/>(b)BOC-4</p> |  | <p>visible light</p>             | <p>BOC-1&gt;BOC-3&gt;BOC-1&gt;BOC-2&gt;<br/>BOC-4<br/>Degradation rate:<br/>RhB 20min 98%</p>                                                                                                                                              | <p>[10]</p> |

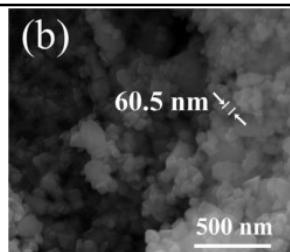

50 mg BiOCl  
RhB(100ml,20mg/L)

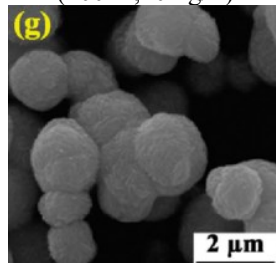

40 mg BiOCl  
CBZ(50ml,2.5mg/L)

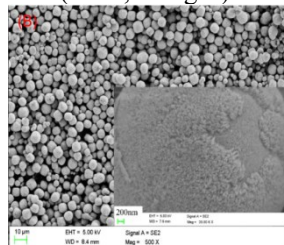

50 mg BiOCl  
NOR (100ml,5mg/L)

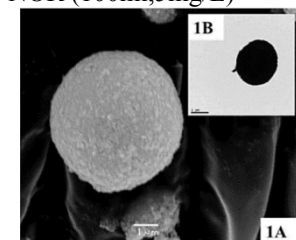

0.08g BiOBr  
MO (200ml,10 mg L<sup>-1</sup>)

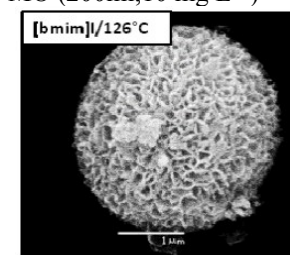

0.025 g BiOI  
gallic acid solution  
(250ml 20 ppm)

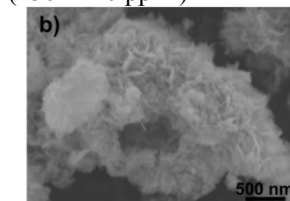

100 mg BiOI  
RhB(20 mg L<sup>-1</sup>)

BiOCl  
ethylene glycolmediated solvothermal  
method;  
BiOCl-1/5/10/15  
Bi(NO<sub>3</sub>)<sub>3</sub>·5H<sub>2</sub>O,KCl(1/5/10/15),ethyl  
ene glycol,160°C 12h

BiOCl-120/140/160/180;  
one-stepsolvothermal method;  
Bi(NO<sub>3</sub>)<sub>3</sub>,ethyleneglycol,HCl;  
120/140/160/180°C 24h  
BiOCl-140-400;  
BiOCl-140,400°C 2h

BiOBr microspheres  
solvothermal synthesis;  
Bi(NO<sub>3</sub>)<sub>3</sub>·5H<sub>2</sub>O ,KBr,ethylene glycol;  
145°C18h

BiOI  
solvothermal method;  
Bi(NO<sub>3</sub>)<sub>3</sub>·5H<sub>2</sub>O ,KI ,ethylene  
glycol;120-216.6°C12-24.5h,  
Bi(NO<sub>3</sub>)<sub>3</sub>·5H<sub>2</sub>O , ionic liquid 1- 5  
butyl-3-metilimidazolium  
iodide,ethylene glycol;120-  
216.6°C12-24.5h

BiOI:hollow flower  
solvothermal method;  
Bi(NO<sub>3</sub>)<sub>3</sub>·5H<sub>2</sub>O ,KI ,ethylene glycol;  
160°C24h

300W  
xenon lamp

BiOCl-10>BiOCl-5>BiOCl-  
15>BiOCl-1  
Degradation rate:  
CBZ 180min 70%

[11]

300W  
xenon lamp

BiOCl-140>BiOCl-120>BiOCl-  
160>BiOCl-180>BiOCl-140-400  
Degradation rate:  
NOR 120min 57.8%

[12]

12W  
xenon lamp

BiOBr>BiOBr(with HA<sub>c</sub>)  
BiOBr(pH=2)>BiOBr(pH=other)  
Degradation rate:  
MO 60min 97%

[13]

12W  
xenon lamp

[bmim]I>KI(126°18h)>other  
Degradation rate:  
gallic acid 60 min 61%

[14]

350W  
Xe arclamp

hollow flowerBiOI>bulk BiOI  
Degradation rate :  
60min 99.6% RhB

[15]

|                                                                                                                                                                                                                              |                                                                                     |                             |                                                                                                                                                                                                                                                                                 |             |
|------------------------------------------------------------------------------------------------------------------------------------------------------------------------------------------------------------------------------|-------------------------------------------------------------------------------------|-----------------------------|---------------------------------------------------------------------------------------------------------------------------------------------------------------------------------------------------------------------------------------------------------------------------------|-------------|
| <p>BiOBr<sub>x</sub>I<sub>1-x</sub><br/>solvothermal method;<br/>Bi(NO<sub>3</sub>)<sub>3</sub>·5H<sub>2</sub>O, NH<sub>4</sub>Br, NH<sub>4</sub>I, ethylene glycol; 160 °C for 12 h</p>                                     | 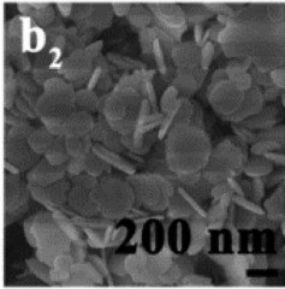   | <p>350W<br/>Xe arc lamp</p> | <p>BiOBr<sub>x</sub>I<sub>1-x</sub>(x=0.8)&gt;BiOBr<sub>x</sub>I<sub>1-x</sub>(x=0.5)<br/>&gt;BiOBr<sub>x</sub>I<sub>1-x</sub>(x=1)&gt;BiOBr<sub>x</sub>I<sub>1-x</sub>(x=0.2)<br/>&gt;BiOBr<sub>x</sub>I<sub>1-x</sub>(x=0)&gt;P25<br/>Degradation rate:<br/>RhB 90min 99%</p> | <p>[16]</p> |
| <p>BiOCl<br/>solvothermal modification method;<br/>OV-BOC<br/>Bi(NO<sub>3</sub>)<sub>3</sub>·5H<sub>2</sub>O, NaCl, EG, 160 °C, 16 h<br/>BOC<br/>Bi(NO<sub>3</sub>)<sub>3</sub>·5H<sub>2</sub>O, NaCl, EtOH, 160 °C, 16h</p> |    | <p>300W<br/>xenon lamp</p>  | <p>OV-BOC+H<sub>2</sub>O<sub>2</sub>&gt;OV-BOC&gt;BOC<br/>&gt;H<sub>2</sub>O<sub>2</sub></p>                                                                                                                                                                                    | <p>[17]</p> |
| <p>BiOCl<br/>alcohol mediated solvothermal method;<br/>Bi(NO<sub>3</sub>)<sub>3</sub>·5H<sub>2</sub>O, KCl, 1-ethanol/ 2-ethylene glycol/3-glycerol;<br/>160 °C, 12h<br/>(d)BiOCl-1<br/>(e)BiOCl-2<br/>(f)BiOCl-3</p>        |   | <p>350W<br/>xenon lamp</p>  | <p>BiOCl-2&gt;BiOCl-3&gt;BiOCl-1<br/>K=0.0118</p>                                                                                                                                                                                                                               | <p>[18]</p> |
| <p>BiOBr<br/>solvothermal route;<br/>Bi(NO<sub>3</sub>)<sub>3</sub>·5H<sub>2</sub>O, KBr, deionized water (ETH, ISO, EG, GLY) 140 °C 16h</p>                                                                                 |  | <p>300W<br/>Xenon lamp</p>  | <p>BiOBr(GLY)&gt;BiOBr(EG)&gt;BiOBr(ISO)<br/>&gt;BiOBr(E)&gt;BiOBr(W)<br/>Degradation rate :<br/>brilliant blue K-NR 120min 90.9%</p>                                                                                                                                           | <p>[19]</p> |
| <p>0.2g BiOBr<br/>Brilliantblue K-NR<br/>(100ml, 30 mg L<sup>-1</sup>)</p>                                                                                                                                                   |                                                                                     |                             |                                                                                                                                                                                                                                                                                 |             |

|                                                                                                                                                                                                                                                                                                                                                                                                                                                                                                         |                                                                                                                                                                                       |                                                                                                                                                                                                                             |
|---------------------------------------------------------------------------------------------------------------------------------------------------------------------------------------------------------------------------------------------------------------------------------------------------------------------------------------------------------------------------------------------------------------------------------------------------------------------------------------------------------|---------------------------------------------------------------------------------------------------------------------------------------------------------------------------------------|-----------------------------------------------------------------------------------------------------------------------------------------------------------------------------------------------------------------------------|
| <p>BiOBr<br/>solvothermal approach;<br/><math>\text{Bi}(\text{NO}_3)_3 \cdot 5\text{H}_2\text{O}</math>, CTAB, ethanol,<br/><math>150^\circ\text{C}</math> 24h<br/>(a)BiOBr-EtOH,<br/>(b)BiOBr-EG,<br/>(c)BiOBr-TB,<br/>(d)BiOBr-BA<br/>(e)BiOBr-ME</p>                                                                                                                                                                                                                                                 | 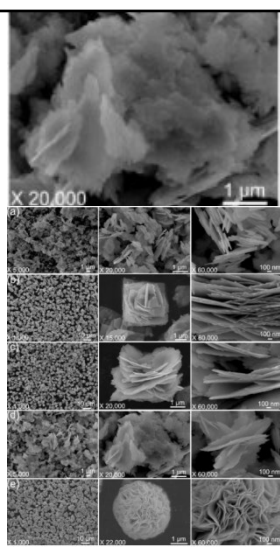 <p>0.025g BiOBr<br/>RhB (100ml, 10 mg L<sup>-1</sup>)<br/>0.1g BiOBr<br/>phenol(100ml, 10 mg/L)</p> | <p>300W<br/>Xenon lamp</p> <p>BiOBr(BA)&gt;BiOBr(ME)&gt;BiOBr(TB)<br/>&gt;BiOBr(EtOH)&gt;BiOBr(EG)&gt;BiOBr<br/>(W)</p> <p>Degradation rate:<br/>RhB K=0.148<br/>Degradation rate:<br/>Phenol 3h almost 20%</p> <p>[20]</p> |
| <p>BiOI<br/>hydrothermal or solvothermal<br/>method;<br/><math>\text{Bi}(\text{NO}_3)_3 \cdot 5\text{H}_2\text{O}</math>, KI, H<sub>2</sub>O, ETH, EG,<br/>GLY; <math>160^\circ\text{C}</math>, 12 h</p>                                                                                                                                                                                                                                                                                                |  <p>40 mg BiOI<br/>As(III)solution(80 mL 5<br/>mg/L)</p>                                            | <p>300W<br/>Xe lamp</p> <p>GLY&gt;EG&gt;ETH<br/>Degradation rate:<br/>As(III) 40 min 96.6%</p> <p>[21]</p>                                                                                                                  |
| <p>BiOI<br/>hydrolysis method (BiOI-H)<br/>solvothermal method (BiOI-ST);<br/>BiOI-ST: <math>\text{Bi}(\text{NO}_3)_3 \cdot 5\text{H}_2\text{O}</math>, KI<br/>, ethylene glycol distilled<br/>water; <math>180^\circ\text{C}</math> 12h</p>                                                                                                                                                                                                                                                            |  <p>0.68g/L BiOI<br/>TCH 2mg/L</p>                                                                 | <p>1000W<br/>tungsten<br/>halogen lamp</p> <p>BiOI-ST&gt;BiOI-H<br/>Degradation rate:<br/>TCH: 101.5 min 100%</p> <p>[22]</p>                                                                                               |
| <p>BiOCl-1<br/>solvothermal process<br/><math>\text{Bi}(\text{NO}_3)_3 \cdot 5\text{H}_2\text{O}</math>, PEG 10000, PEG 400,<br/>NaCl, <math>180^\circ\text{C}</math> 24h<br/>BiOCl-2<br/><math>\text{Bi}(\text{NO}_3)_3 \cdot 5\text{H}_2\text{O}</math>, CTAB, PEG 400, NaCl<br/>, <math>180^\circ\text{C}</math> 15h<br/>BiOCl<br/><math>\text{Bi}(\text{NO}_3)_3 \cdot 5\text{H}_2\text{O}</math>, mannitol solution, NaCl,<br/><math>160^\circ\text{C}</math> 3h<br/>(a)BiOCl-1<br/>(b)BiOCl-2</p> |  <p>50 mg BiOCl<br/>BPA aqueous (50ml, <math>1 \times 10^{-5}</math> M)</p>                        | <p>300W<br/>Hg arc lamp</p> <p>BiOCl-1&gt;BiOCl-2<br/>Degradation rate:<br/>BPA 6h 96%<br/>Degradation rate:<br/>TOC 13h 96%</p> <p>[23]</p>                                                                                |

|                                                                                                                                                                                                                                                                                       |                                                                                     |                                                 |                                                                                                                                                                                                                                                                                        |             |
|---------------------------------------------------------------------------------------------------------------------------------------------------------------------------------------------------------------------------------------------------------------------------------------|-------------------------------------------------------------------------------------|-------------------------------------------------|----------------------------------------------------------------------------------------------------------------------------------------------------------------------------------------------------------------------------------------------------------------------------------------|-------------|
| <p>BiOCl<br/>facile solvothermal method;<br/><math>\text{Bi}(\text{NO}_3)_3 \cdot 5\text{H}_2\text{O}</math>, KCl, methanol<br/>,desired volume fractions of water (0,<br/>5, 10, and 15%)<math>120^\circ\text{C}</math>12h<br/>BOC-1 BOC-2 BOC-3 BOC-4<br/>(e)BOC-1<br/>(g)BOC-3</p> | 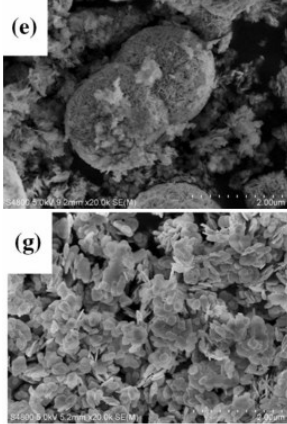   | <p>300W<br/>xenon lamp</p>                      | <p>BOC-3&gt;BOC-1&gt;BOC-2&gt;BOC-4<br/>Degradation rate:<br/>MO 50min almost 100%<br/>Degradation rate:<br/>RhB 40min almost 100%</p>                                                                                                                                                 | <p>[24]</p> |
| <p>BiOX<br/>microwave-assisted solvothermal<br/>method;<br/><math>\text{Bi}(\text{NO}_3)_3 \cdot 5\text{H}_2\text{O}</math>, KX, EG, EtOH, PEG, m<br/>icrowave 450W(10 20 30 60min)(120<br/>140 160°C)pH (3, 5, 7, and 9)<br/>BiOAxB1-x KAB</p>                                       |    | <p>350W<br/>xenon light</p>                     | <p>hydrogen evolution rate<br/>BiOI<br/>Ph=7&gt;Ph=5&gt;Ph=9&gt;Ph=3<br/>Ph=7(1,316.9 <math>\mu\text{mol h}^{-1}\text{g}^{-1}</math>)<br/>catalyst dosage<br/>0.2g/L&gt;other<br/>1316.9 <math>\mu\text{mol h}^{-1}\text{g}^{-1}</math><br/>Catalyst type<br/>BiOI&gt;BiOBr, BiOCl</p> | <p>[25]</p> |
| <p>BiOCl<br/>hydrolysis method;<br/><math>\text{NaBiO}_3 \cdot 2\text{H}_2\text{O}</math>, deionized water, HCl,</p>                                                                                                                                                                  |   | <p>500W<br/>xenon lamp</p>                      | <p>BiOI&gt;BiOAxB1-x<br/>BiOCl(400mg/L)&gt;BiOCl(300mg/L)&gt;<br/>BiOCl(200mg/L)&gt;BiOCl(100mg/L)&gt;<br/>BiOCl(50mg/L)<br/>Degradation rate:BiOCl(300mg/L)<br/>ATL 60min 90%<br/>BiOCl(pH=5.2)&gt;BiOCl(pH=6)&gt;BiOCl<br/>(pH=7)&gt;BiOCl(pH=8.7)&gt;BiOCl(pH=8<br/>)</p>           | <p>[26]</p> |
| <p>BiOCl<br/>hydrolytic method;<br/>bismuth nitrate, HCl, Sodium<br/>carbonate, pH=2</p>                                                                                                                                                                                              |  | <p>UV<br/>Irradiation<br/>(254nm, 10<br/>W)</p> | <p>BiOCl&gt;In<sub>2</sub>O<sub>3</sub>&gt;P25<br/>defluorination efficiency :<br/>24h, 59.3%</p>                                                                                                                                                                                      | <p>[27]</p> |
| <p>BiOCl<br/>hydrolysis method;<br/><math>\text{NaCl}</math>, <math>\text{Bi}(\text{NO}_3)_3 \cdot 5\text{H}_2\text{O}</math>, ethanol, <math>\text{NaCl}</math><br/>, <math>90^\circ\text{C}</math> 3h</p>                                                                           |  | <p>500W<br/>xenon lamp</p>                      | <p>RhB&gt; MO &gt; MB .<br/>Degradation rate:<br/>MB 30min 94%</p>                                                                                                                                                                                                                     | <p>[28]</p> |

MO/MB(40ml,10mg/L)

BiOBr-1 a  
 hydrolysis process;  
 $\text{Bi}(\text{NO}_3)_3 \cdot 5\text{H}_2\text{O}$ , KBr, EG, deionised water  
 BiOBr-2 b  
 solvothermal synthesis;  
 $\text{Bi}(\text{NO}_3)_3 \cdot 5\text{H}_2\text{O}$ , KBr, EG, 160°C, 10h

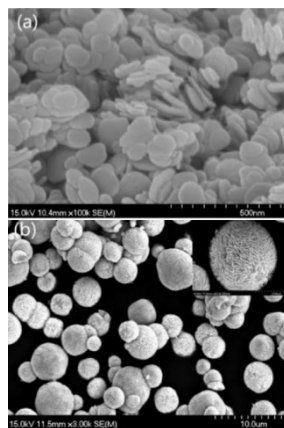

300W xenon lamp  
 UV irradiation:  
 RhB 120min 97%  
 BiOBr-1>P25>BiOBr-2  
 vis-light irradiation:  
 BiOBr-1>BiOBr-2>P25 [29]

0.02g BiOBr  
 RhB(100ml, 10 mg L<sup>-1</sup>)

BiOBr  
 hydrolysis or alcoholysis method;  
 $\text{BiBr}_3$ , water(H<sub>2</sub>O), ethanol, isopropyl alcohol, room temperature, magnetic stirring 20°C 40°C 60°C

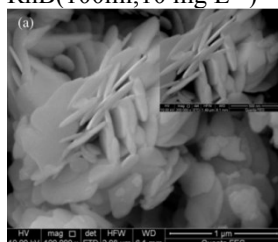

350W Xenon lamp  
 BiOBr-60(IPA)>BiOBr(H<sub>2</sub>O)>BiOBr(EtOH) [30]  
 Degradation rate :  
 BiOBr(IPA)  
 MO 75min 98.9%  
 BiOBr(H<sub>2</sub>O)  
 MO 75min 91.3%

0.03g BiOBr  
 MO (50ml, 10 mg L<sup>-1</sup>)

BiOI  
 hydrolysis method;  
 $\text{Bi}(\text{NO}_3)_3 \cdot 5\text{H}_2\text{O}$ , KI, deionized water:  
 10-50ml, room temperature.

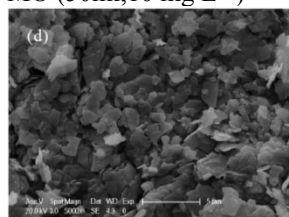

300W Xe arc lamp  
 BiOI-40>BiOI-50>BiOI-30>BiOI-20 >BiOI-10 [31]  
 Degradation rate:  
 MO 120 min 71.4%

0.05 g BiOI  
 MO(100 ml 10 mg/L)

BiOX(Cl/I) BiOCl /BiOI  
 hydrolysis method  
 $\text{NaBiO}_3$ , ethanol, DI water, HCl/HI  
 (b)BiOCl  
 (d)BiOI

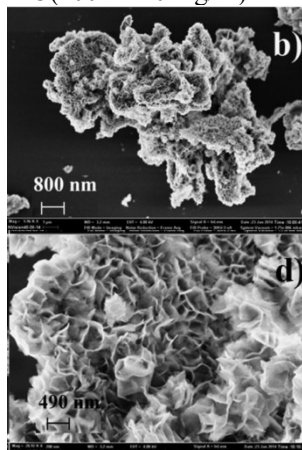

four 128W/m<sup>2</sup> 254nm bulbs  
 Degradation rate: BiOI>BiOCl>TiO<sub>2</sub> EE2 30min 100% [32]  
 Degradation rate: BiOCl>BiOI>TiO<sub>2</sub> estriol 30min 100%

BiOX(500mg/L)  
 EE2and estriol

BiOX  
 facile co-precipitation method,  
 $\text{Bi}(\text{NO}_3)_3 \cdot 5\text{H}_2\text{O}$ , NaBr solution,  
 stirre 24 h  
 low-temperature solution route,  
 facile chemical etching method

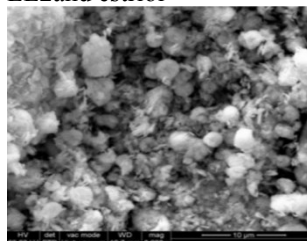

BiOI<sub>0.5</sub>Br<sub>0.5</sub>> BiOI>BiOBr [33]  
 Degradation rate:  
 Lindane 120min 95%

|                                                                                                                                                                                                                                                                                         |                                                                                     |                                           |                                                                                                                                                                                                        |             |
|-----------------------------------------------------------------------------------------------------------------------------------------------------------------------------------------------------------------------------------------------------------------------------------------|-------------------------------------------------------------------------------------|-------------------------------------------|--------------------------------------------------------------------------------------------------------------------------------------------------------------------------------------------------------|-------------|
| <p>Br-BiOI<br/>chemical precipitation route;<br/><math>\text{Bi}(\text{NO}_3)_3 \cdot 5\text{H}_2\text{O}</math>, KI, NaBr, ethylene glycol; room temperature</p>                                                                                                                       | 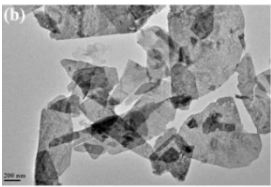   | <p>500W<br/>Xe lamp<br/>visible light</p> | <p>15% Br-BiOI &gt; 20% Br-BiOI &gt; 10% Br-BiOI &gt; 5% Br-BiOI &gt; BiOI<br/>Degradation rate :<br/>15% Br-BiOI ; 2.5h RhB almost 100%<br/>15% Br-BiOI; 10h phenol more than 50%</p>                 | <p>[34]</p> |
| <p><math>\text{Bi}_{24}\text{O}_{31}\text{Cl}_{10}</math><br/>chemical precipitation method;<br/><math>\text{Bi}(\text{NO}_3)_3 \cdot 5\text{H}_2\text{O}</math>, <math>\text{HNO}_3</math>, CTAC, NaOH, 400°C-800°C</p>                                                                |    | <p>500W<br/>xenon lamp</p>                | <p><math>\text{Bi}_{24}\text{O}_{31}\text{Cl}_{10}</math> &gt; BiOCl &gt; <math>\text{TiO}_2/\text{N}</math> &gt; <math>\text{Bi}_2\text{O}_3</math><br/>Degradation rate:<br/>RhB 60min 95%</p>       | <p>[35]</p> |
| <p>BiOCl<br/>two-phase reaction; BiOCl-1 octagonal;<br/><math>\text{Bi}(\text{NO}_3)_3 \cdot 5\text{H}_2\text{O}</math>, HCl, deionized water<br/>BiOCl-2<br/><math>\text{Bi}(\text{NO}_3)_3 \cdot 5\text{H}_2\text{O}</math>, KCl, deionized water<br/>(b) BiOCl-1<br/>(d) BiOCl-2</p> |   | <p>500W<br/>xenon lamp</p>                | <p>BiOCl-1 &gt; BiOCl-2<br/>Degradation rate:<br/>MO 80min almost 100%</p>                                                                                                                             | <p>[36]</p> |
| <p>BiOX<br/>two-phase method;<br/>BiOCl/Br-NSS<br/><math>\text{Bi}(\text{NO}_3)_3 \cdot 5\text{H}_2\text{O}</math>, ODE, OA, OLA, <math>\text{N}_2</math>, 170°C, KBr/I/Cl, <math>\text{HNO}_3</math>, 100°C, 0.5h</p>                                                                  |  | <p>300W<br/>xenon lamp</p>                | <p>BiOBr-acid0.5 &gt; BiOBr-neutral0.5 &gt; BiOBr-acid4<br/>Degradation rate:<br/>RhB 50min 96%<br/>Degradation rate:<br/>MO 120min 39%<br/><math>\text{O}_2</math> evolution<br/>BiOBr-acid4 best</p> | <p>[37]</p> |
| <p>BiOI nanoplates<br/>sonochemical method;<br/><math>\text{Bi}(\text{NO}_3)_3 \cdot 6\text{H}_2\text{O}</math>, NaI, deionized water, NaOH; 35kHz ultrasonic bath at 80°C 5h.</p>                                                                                                      |  | <p>Xe lamp</p>                            | <p>pH=12 &gt; pH=10 &gt; pH=8<br/>Degradation rate:<br/>RhB 180min 81.19%</p>                                                                                                                          | <p>[38]</p> |



|                                                                                                                                                                                                                                                           |                                                                                     |                                                                                                         |                                                                                                                                                                                                       |             |
|-----------------------------------------------------------------------------------------------------------------------------------------------------------------------------------------------------------------------------------------------------------|-------------------------------------------------------------------------------------|---------------------------------------------------------------------------------------------------------|-------------------------------------------------------------------------------------------------------------------------------------------------------------------------------------------------------|-------------|
| <p>BiOI<br/>microwave method<br/><math>\text{Bi}(\text{NO}_3)_3 \cdot 5\text{H}_2\text{O}</math>, acetic acid, EDTA, KI, 110°C, 5min</p>                                                                                                                  | 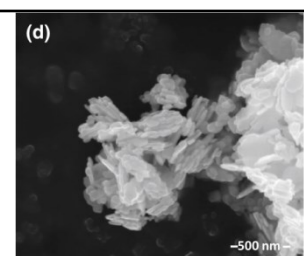   | <p>6000K<br/>Xenon lamp</p>                                                                             | <p>B110-40&gt;B130-40&gt;B110-40&gt;B150-40&gt;B110-20&gt;B110-00<br/>Degradation rate:<br/>RhB 20min 98.2%</p>                                                                                       | <p>[39]</p> |
| <p>BiOBr<br/>microwave-assisted ionothermal synthesis;<br/><math>\text{Bi}(\text{NO}_3)_3 \cdot 5\text{H}_2\text{O}</math>, HB (OB, HK, CTAB, MI), EG, 1000W, 160°C/400°C 4h</p>                                                                          |    | <p>300W<br/>Xenon lamp</p>                                                                              | <p>BiOBr&gt;BiOBr(THB)&gt;BiOBr(BQ)&gt;BiOBr(EDTA)&gt;BiOBr(<math>\text{AgNO}_3</math>)<br/>Degradation rate :<br/>RhB 180min 99.57%<br/>TOC 180min 12.24%</p>                                        | <p>[40]</p> |
| <p>BiOBr porous nanospheres<br/>microwave-assisted ionic liquid Synthesis;<br/><math>\text{Bi}(\text{NO}_3)_3 \cdot 5\text{H}_2\text{O}</math>, PVP K30, EG, [C16mim]Br, microwave reactor 160°C 20min<br/>BiOBr<br/>hollow microspheres(without pvp)</p> |   | <p>300W<br/>Xenon lamp</p>                                                                              | <p>Porous BiOBr&gt;Hollow BiOBr<br/>Degradation rate :<br/>RhB 60min almost 100%</p>                                                                                                                  | <p>[41]</p> |
| <p>BiOBr<br/>combustion method;<br/><math>\text{Bi}(\text{NO}_3)_3 \cdot 5\text{H}_2\text{O}</math>, <math>\text{NH}_4\text{Br}</math>, urea, nitric acid, deionized water; 300°C</p>                                                                     |  | <p>300W<br/>xenon lamp</p>                                                                              | <p><math>\text{NH}_4\text{Br}</math>/ <math>\text{Bi}(\text{NO}_3)_3 \cdot 5\text{H}_2\text{O}</math> (3, 4, and 5)<br/>BiOBr-5&gt;BiOBr-4&gt;BiOBr-3<br/>Degradation rate :<br/>RhB 120min 91.6%</p> | <p>[42]</p> |
| <p>BiOBr<br/>electrospinning and postcalcination<br/><math>\text{BiBr}_3</math> 500°C<br/><math>\text{BiBr}_3</math> (as 1%, 2%, 3% and 4%) in polymer (PAN)</p>                                                                                          |  | <p>150W<br/>Xe lamp</p>                                                                                 | <p>BiOBr(X=4)&gt;BiOBr(X=1)&gt;BiOBr(X=3)&gt;BiOBr(X=2)</p>                                                                                                                                           | <p>[43]</p> |
| <p>BiOBr nanosheets<br/>Liquid Phase Exfoliation<br/><math>\text{Bi}(\text{NO}_3)_3 \cdot 5\text{H}_2\text{O}</math>, KBr, formamide,</p>                                                                                                                 |  | <p>500W<br/>Xenon lamp<br/><math>\text{CO}_2</math> reduction:<br/>200mg BiOBr<br/>300W<br/>Xe lamp</p> | <p>monolayered BiOBr&gt;bulk BiOBr<br/>Degradation rate:<br/>MO 300min 33%<br/><math>\text{CO}_2</math> reduction performance:<br/>monolayered BiOBr&gt;bulk BiOBr</p>                                | <p>[44]</p> |

BiOClBiOBr BiOI  
solvent-free grinding mechanical  
method;  
Bi(NO<sub>3</sub>)<sub>3</sub>·5H<sub>2</sub>O, KBr/I/Cl, agate  
mortar, ground  
for 5 min (0.5/1/2/3/5/10 min)  
(a) BiOCl  
(d) BiOBr  
(g) BiOI

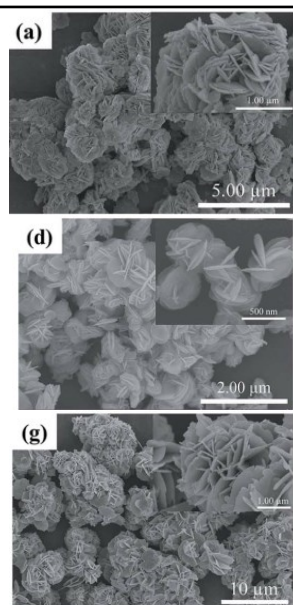

500W  
xenon lamp  
BiOCl>BiOBr>BiOI

[45]

10 mg photocatalyst  
RhB/MB( 50 mL 5mg/L)

## References

- [3] J. Zhang, J. Wu, P. Lu, Q. Liu, T. Huang, H. Tian, R. Zhou, J. Ren, B. Yuan, X. Sun, *Mater. Lett.* 186 (2017) 353-356.
- [4] X. Zhang, R. Li, M. Jia, S. Wang, Y. Huang, C. Chen, *Chem. Eng. J.* 274 (2015) 290-297.
- [5] P. Intaphong, A. Phuruangrat, K. Karthik, P. Dumrongrojthanath, T. Thongtem, S. Thongtem, *J. Inorg. Organomet. P.* 30 (2020) 714-721.
- [6] H. Feng, Z. Xu, L. Wang, Y. Yu, D. Mitchell, D. Cui, X. Xu, J. Shi, T. Sannomiya, Y. Du, *ACS Appl. Mater. Interface* 7 (2015) 27592-27596.
- [7] L. Dou, D. Ma, J. Chen, J. Li, J. Zhong, *Solid State Sci.* 90 (2019) 1-8.
- [8] Z. Zou, H. Xu, D. Li, J. Sun, D. Xia, *Appl. Surf. Sci.* 463 (2019) 1011-1018.
- [9] K. Li, Y. Liang, J. Yang, Q. Gao, Y. Zhu, S. Liu, R. Xu, X. Wu, *J. Alloy. Compd.* 695 (2017) 238-249.
- [10] Y. Cai, D. Li, J. Sun, M. Chen, Y. Li, Z. Zou, H. Zhang, H. Xu, D. Xia, *Appl. Surf. Sci.* 439 (2018) 697-704.
- [11] X. Gao, W. Peng, G. Tang, Q. Guo, Y. Luo, *J. Alloy. Compd.* 757 (2018) 455-465.
- [12] J. Tian, Z. Chen, X. Deng, Q. Sun, Z. Sun, W. Li, *Appl. Surf. Sci.* 453 (2018) 373-382.
- [13] A.C. Mera, H. Valdes, F.J. Jamett, M. Meléndrez, *Solid State Sci.* 65 (2017) 15-21.
- [14] A.C. Mera, Y. Moreno, D. Contreras, N. Escalona, M.F. Meléndrez, R.V. Mangalaraja, H.D. Mansilla, *Solid State Sci.* 63 (2017) 84-92.
- [15] Z. Jiang, X. Liang, Y. Liu, T. Jing, Z. Wang, X. Zhang, X. Qin, Y. Dai, B. Huang, *Appl. Catal. B-Environ.* 211 (2017) 252-257.
- [16] X. Zhang, C.Y. Wang, L.W. Wang, G.X. Huang, W.K. Wang, H.Q. Yu, *Sci. Rep.* 6 (2016) 1-10.
- [17] H. Zhao, X. Liu, Y. Dong, Y. Xia, H. Wang, *Appl. Catal. B-Environ.* 256 (2019) 117872.
- [18] X. Gao, Q. Guo, G. Tang, W. Zhu, Y. Luo, *J. Solid State Chem.* 277 (2019) 133-138.
- [19] H. Xing, H. Ma, Y. Fu, X. Zhang, X. Dong, X. Zhang, *J. Renew. Sustain. Ener.* 7 (2015) 063120.
- [20] X.X. Wei, B. Cui, X. Wang, Y. Cao, L. Gao, S. Guo, C.M. Chen, *CrystEngComm* 21 (2019) 1750-1757.
- [21] J. Hu, S. Weng, Z. Zheng, Z. Pei, M. Huang, P. Liu, *J. Hazard. Mater.* 264 (2014) 293-302.
- [22] A. Dehghan, M.H. Dehghani, R. Nabizadeh, N. Ramezani, M. Alimohammadi, A.A. Najafpoor, *Chem. Eng. Res. Des.* 129 (2018) 217-230.
- [23] S.q. Guo, X.h. Zhu, H.j. Zhang, B.c. Gu, W. Chen, L. Liu, P.J. Alvarez, *Environ. Sci. Technol.* 52 (2018) 6872-6880.
- [24] Y. Xu, X. Hu, H. Zhu, J. Zhang, *J. Mater. Sci.* 51 (2016) 4342-4348.
- [25] G.J. Lee, Y.C. Zheng, J.J. Wu, *Catal. Today* 307 (2018) 197-204.
- [26] J. Hu, X. Jing, L. Zhai, J. Guo, K. Lu, L. Mao, *Chemosphere* 220 (2019) 77-85.
- [27] Z. Song, X. Dong, N. Wang, L. Zhu, Z. Luo, J. Fang, C. Xiong, *Chem. Eng. J.* 317 (2017) 925-934.
- [28] D. Zhang, L. Chen, C. Xiao, J. Feng, L. Liao, Z. Wang, T. Wei, *J. Nanomater.* 2016 (2016) 5697672.
- [29] Q.L. Yuan, Y. Zhang, H.Y. Yin, Q.L. Nie, W.W. Wu, *Rapid. J. Exp. Nanosci.* 11 (2016) 359-369.
- [30] R. Li, X. Gao, C. Fan, X. Zhang, Y. Wang, Y. Wang, *Appl. Surf. Sci.* 355 (2015) 1075-1082.
- [31] J. Lu, J. Wu, W. Xu, H. Cheng, X. Qi, Q. Li, Y. Zhang, Y. Guan, Y. Ling, Z. Zhang, *Mater. Lett.* 219 (2018) 260-264.
- [32] J.C. Ahern, R. Fairchild, J.S. Thomas, J. Carr, H.H. Patterson, *Appl. Catal. B-Environ.* 179 (2015) 229-238.
- [33] A. Zhang, W. Xing, D. Zhang, H. Wang, G. Chen, J. Xiang, *Catal. Commun.* 87 (2016) 57-61.
- [34] H. Huang, X. Li, X. Han, N. Tian, Y. Zhang, T. Zhang, *Phys. Chem. Chem. Phys.* 17 (2015) 3673-3679.

- [35] L. Wang, J. Shang, W. Hao, S. Jiang, S. Huang, T. Wang, Z. Sun, Y. Du, S. Dou, T. Xie, D. Wang, J. Wang, *Sci. Rep.* 4 (2014) 7384.
- [36] Z. Xu, *Ferroelectrics* 527 (2018) 37-43.
- [37] Z. Wang, Z. Chu, C. Dong, Z. Wang, S. Yao, H. Gao, Z. Liu, Y. Liu, B. Yang, H. Zhang, *ACS Appl. Nano Mater.* 3 (2020) 1981-1991.
- [38] P. Intaphong, A. Phuruangrat, S. Thongtem, T. Thongtem, *Mater. Lett.* 213 (2018) 88-91.
- [39] J.M. Montoya-Zamora, A. Martínez-de la Cruz, E.L. Cuéllar, *Res. Chem. Intermediat.* 43 (2017) 2545-2563.
- [40] Y. Miao, Z. Lian, Y. Huo, H. Li, *Chinese J. Catal.* 39 (2018) 1411-1417.
- [41] Z. Chen, J. Zeng, J. Di, D. Zhao, M. Ji, J. Xia, H. Li, *Green Energy Environ.* 2 (2017) 124-133.
- [42] M. Gao, D. Zhang, X. Pu, H. Li, J. Li, X. Shao, K. Ding, *Mater. Lett.* 140 (2015) 31-34.
- [43] V.J. Babu, M. Sireesha, R.S.R. Bhavatharini, S. Ramakrishna, *Mater. Lett.* 169 (2016) 50-53.
- [44] H. Yu, H. Huang, K. Xu, W. Hao, Y. Guo, S. Wang, X. Shen, S. Pan, Y. Zhang, *ACS Sustain. Chem. Eng.* 5 (2017) 10499-10508.
- [45] Y. Long, Q. Han, Z. Yang, Y. Ai, S. Sun, Y. Wang, Q. Liang, M. Ding, *J. Mater. Chem. A* 6 (2018) 13005-13011.
